# Supplementary material for: Spatial modelling improves genetic evaluation in smallholder breeding programs
Source: PubMed Central journal article supplement (PMC7670695; doi:10.1186/s12711-020-00588-w), 2020-11-16
Supplement: 12711_2020_588_MOESM3_ESM.pdf [file 12711_2020_588_MOESM3_ESM.pdf]

# Additional tables: Spatial modelling improves genetic evaluation in smallholder breeding programs

Maria L. Selle, Ingelin Steinsland, Owen Powell, John M. Hickey, Gregor Gorjanc

November 1, 2020

## Simulated data

### Rank correlations

Table S1 shows the average rank correlation for the top 100 individuals between the true and estimated or predicted breeding values for all levels of genetic connectedness, using pedigree or genomic data, when the herd locations were simulated from a bi-variate normal distribution with mean equal to the village locations, and variance  $3.5 \cdot 10^{-4} \mathbf{I}_{2 \times 2}$  (intermediate herd clustering).

Table S1: Average rank correlation for the top 100 individuals over 60 replications for the different levels of genetic connectedness, using pedigree or genomic markers, and for both estimated breeding values (EBV) and predicted breeding values (PBV). The standard error had order of magnitude  $10^{-2}$ .

|                 | Weak |      | Intermediate |      | Strong |      |
|-----------------|------|------|--------------|------|--------|------|
|                 | EBV  | PBV  | EBV          | PBV  | EBV    | PBV  |
| <b>Pedigree</b> |      |      |              |      |        |      |
| G               | 0.11 | 0.09 | 0.09         | 0.05 | 0.06   | 0.05 |
| GH              | 0.12 | 0.09 | 0.11         | 0.07 | 0.08   | 0.07 |
| GS              | 0.18 | 0.20 | 0.14         | 0.07 | 0.12   | 0.11 |
| GHS             | 0.19 | 0.20 | 0.16         | 0.08 | 0.13   | 0.11 |
| GHSC            | 0.21 | 0.20 | 0.16         | 0.08 | 0.13   | 0.11 |
| <b>Genomic</b>  |      |      |              |      |        |      |
| G               | 0.12 | 0.20 | 0.11         | 0.17 | 0.11   | 0.18 |
| GH              | 0.13 | 0.21 | 0.15         | 0.23 | 0.16   | 0.26 |
| GS              | 0.24 | 0.37 | 0.20         | 0.32 | 0.24   | 0.35 |
| GHS             | 0.26 | 0.39 | 0.23         | 0.35 | 0.25   | 0.37 |
| GHSC            | 0.25 | 0.41 | 0.23         | 0.36 | 0.25   | 0.37 |

### Changing proportion of spatial variance

Here we show the average accuracy and CRPS between TBV and EBV or PBV for all levels of genetic connectedness, using both pedigree and genomic data, when varying the proportion of spatial variance relative to the sum of spatial variance and herd effect variance. The herd locations were simulated from a bi-variate normal distribution with mean equal to the village locations, and variance  $3.5 \cdot 10^{-4} \mathbf{I}_{2 \times 2}$  (intermediate herd clustering).

Table S2 and Table S3 respectively show accuracy and CRPS for weak genetic connectedness. Table S4 and Table S5 respectively show accuracy and CRPS for intermediate genetic connectedness. Table S6 and Table S7 respectively show accuracy and CRPS for strong genetic connectedness.

Table S2: Average accuracy for EBV and PBV with weak genetic connectedness, using pedigree or genomic data, with varying proportion of spatial variance. The standard error for some values had order of magnitude  $10^{-2}$ , and most had  $10^{-3}$

| $\sigma_s^2/(\sigma_s^2 + \sigma_h^2)$ | EBV  |      |      |      |      |      | PBV  |      |      |      |      |      |
|----------------------------------------|------|------|------|------|------|------|------|------|------|------|------|------|
|                                        | 0    | 0.2  | 0.4  | 0.6  | 0.8  | 1    | 0    | 0.2  | 0.4  | 0.6  | 0.8  | 1    |
| <b>Pedigree</b>                        |      |      |      |      |      |      |      |      |      |      |      |      |
| G                                      | 0.53 | 0.40 | 0.35 | 0.34 | 0.32 | 0.31 | 0.54 | 0.38 | 0.32 | 0.29 | 0.26 | 0.23 |
| GH                                     | 0.57 | 0.46 | 0.39 | 0.37 | 0.34 | 0.32 | 0.57 | 0.42 | 0.34 | 0.31 | 0.27 | 0.24 |
| GS                                     | 0.51 | 0.48 | 0.49 | 0.52 | 0.56 | 0.60 | 0.51 | 0.46 | 0.47 | 0.50 | 0.53 | 0.58 |
| GHS                                    | 0.57 | 0.53 | 0.53 | 0.54 | 0.56 | 0.60 | 0.56 | 0.51 | 0.51 | 0.52 | 0.53 | 0.58 |
| <b>Genomic</b>                         |      |      |      |      |      |      |      |      |      |      |      |      |
| G                                      | 0.54 | 0.40 | 0.36 | 0.34 | 0.31 | 0.32 | 0.55 | 0.38 | 0.34 | 0.31 | 0.27 | 0.30 |
| GH                                     | 0.64 | 0.47 | 0.40 | 0.36 | 0.33 | 0.33 | 0.62 | 0.43 | 0.37 | 0.33 | 0.28 | 0.30 |
| GS                                     | 0.53 | 0.51 | 0.54 | 0.57 | 0.63 | 0.70 | 0.53 | 0.50 | 0.53 | 0.55 | 0.60 | 0.67 |
| GHS                                    | 0.64 | 0.60 | 0.61 | 0.62 | 0.64 | 0.70 | 0.62 | 0.58 | 0.58 | 0.58 | 0.61 | 0.67 |

Table S3: Average CRPS for EBV and PBV with weak genetic connectedness, using pedigree or genomic data, with varying proportion of spatial variance. The standard error for all values had order of magnitude  $10^{-3}$

| $\sigma_s^2/(\sigma_s^2 + \sigma_h^2)$ | EBV   |       |       |       |       |       | PBV   |       |       |       |       |       |
|----------------------------------------|-------|-------|-------|-------|-------|-------|-------|-------|-------|-------|-------|-------|
|                                        | 0     | 0.2   | 0.4   | 0.6   | 0.8   | 1     | 0     | 0.2   | 0.4   | 0.6   | 0.8   | 1     |
| <b>Pedigree</b>                        |       |       |       |       |       |       |       |       |       |       |       |       |
| G                                      | 0.164 | 0.271 | 0.395 | 0.552 | 0.688 | 0.730 | 0.164 | 0.255 | 0.347 | 0.429 | 0.489 | 0.542 |
| GH                                     | 0.155 | 0.237 | 0.332 | 0.406 | 0.492 | 0.618 | 0.155 | 0.213 | 0.289 | 0.359 | 0.431 | 0.519 |
| GS                                     | 0.161 | 0.170 | 0.171 | 0.170 | 0.168 | 0.165 | 0.162 | 0.155 | 0.155 | 0.152 | 0.149 | 0.142 |
| GHS                                    | 0.155 | 0.164 | 0.167 | 0.166 | 0.166 | 0.164 | 0.155 | 0.146 | 0.148 | 0.147 | 0.147 | 0.142 |
| <b>Genomic</b>                         |       |       |       |       |       |       |       |       |       |       |       |       |
| G                                      | 0.158 | 0.242 | 0.317 | 0.385 | 0.452 | 0.514 | 0.158 | 0.237 | 0.313 | 0.384 | 0.450 | 0.524 |
| GH                                     | 0.139 | 0.214 | 0.287 | 0.359 | 0.436 | 0.508 | 0.142 | 0.209 | 0.284 | 0.357 | 0.433 | 0.517 |
| GS                                     | 0.154 | 0.160 | 0.157 | 0.153 | 0.144 | 0.129 | 0.155 | 0.141 | 0.142 | 0.138 | 0.131 | 0.116 |
| GHS                                    | 0.139 | 0.148 | 0.147 | 0.146 | 0.140 | 0.129 | 0.142 | 0.134 | 0.135 | 0.133 | 0.127 | 0.116 |

Table S4: Average accuracy for EBV and PBV with intermediate genetic connectedness, using pedigree or genomic data, with varying proportion of spatial variance. The standard error for some values had order of magnitude  $10^{-2}$ , and most had  $10^{-3}$

| $\sigma_s^2/(\sigma_s^2 + \sigma_h^2)$ | EBV  |      |      |      |      |      | PBV  |      |      |      |      |      |
|----------------------------------------|------|------|------|------|------|------|------|------|------|------|------|------|
|                                        | 0    | 0.2  | 0.4  | 0.6  | 0.8  | 1    | 0    | 0.2  | 0.4  | 0.6  | 0.8  | 1    |
| <b>Pedigree</b>                        |      |      |      |      |      |      |      |      |      |      |      |      |
| G                                      | 0.51 | 0.40 | 0.35 | 0.33 | 0.32 | 0.32 | 0.29 | 0.22 | 0.18 | 0.17 | 0.17 | 0.16 |
| GH                                     | 0.61 | 0.51 | 0.44 | 0.39 | 0.36 | 0.33 | 0.36 | 0.29 | 0.24 | 0.21 | 0.18 | 0.16 |
| GS                                     | 0.53 | 0.53 | 0.55 | 0.59 | 0.61 | 0.65 | 0.31 | 0.32 | 0.33 | 0.35 | 0.37 | 0.41 |
| GHS                                    | 0.61 | 0.60 | 0.60 | 0.62 | 0.62 | 0.65 | 0.37 | 0.37 | 0.37 | 0.38 | 0.38 | 0.41 |
| <b>Genomic</b>                         |      |      |      |      |      |      |      |      |      |      |      |      |
| G                                      | 0.61 | 0.51 | 0.42 | 0.39 | 0.37 | 0.35 | 0.46 | 0.40 | 0.33 | 0.26 | 0.26 | 0.26 |
| GH                                     | 0.72 | 0.66 | 0.57 | 0.51 | 0.45 | 0.39 | 0.56 | 0.52 | 0.44 | 0.36 | 0.33 | 0.28 |
| GS                                     | 0.63 | 0.65 | 0.67 | 0.70 | 0.73 | 0.77 | 0.47 | 0.52 | 0.54 | 0.54 | 0.57 | 0.60 |
| GHS                                    | 0.72 | 0.72 | 0.72 | 0.73 | 0.74 | 0.77 | 0.56 | 0.58 | 0.58 | 0.57 | 0.58 | 0.60 |

Table S5: Average CRPS for EBV and PBV with intermediate genetic connectedness, using pedigree or genomic data, with varying proportion of spatial variance. The standard error for all values had order of magnitude  $10^{-3}$

| $\sigma_s^2/(\sigma_s^2 + \sigma_h^2)$ | EBV   |       |       |       |       |       | PBV   |       |       |       |       |       |
|----------------------------------------|-------|-------|-------|-------|-------|-------|-------|-------|-------|-------|-------|-------|
|                                        | 0     | 0.2   | 0.4   | 0.6   | 0.8   | 1     | 0     | 0.2   | 0.4   | 0.6   | 0.8   | 1     |
| <b>Pedigree</b>                        |       |       |       |       |       |       |       |       |       |       |       |       |
| G                                      | 0.165 | 0.268 | 0.396 | 0.536 | 0.685 | 0.709 | 0.181 | 0.233 | 0.306 | 0.364 | 0.411 | 0.431 |
| GH                                     | 0.153 | 0.211 | 0.296 | 0.370 | 0.455 | 0.578 | 0.174 | 0.189 | 0.239 | 0.284 | 0.335 | 0.398 |
| GS                                     | 0.160 | 0.167 | 0.164 | 0.159 | 0.159 | 0.153 | 0.178 | 0.160 | 0.158 | 0.156 | 0.154 | 0.150 |
| GHS                                    | 0.153 | 0.161 | 0.159 | 0.157 | 0.158 | 0.153 | 0.173 | 0.156 | 0.154 | 0.154 | 0.153 | 0.150 |
| <b>Genomic</b>                         |       |       |       |       |       |       |       |       |       |       |       |       |
| G                                      | 0.145 | 0.201 | 0.262 | 0.319 | 0.372 | 0.428 | 0.162 | 0.187 | 0.235 | 0.285 | 0.322 | 0.364 |
| GH                                     | 0.126 | 0.144 | 0.176 | 0.218 | 0.276 | 0.358 | 0.148 | 0.141 | 0.165 | 0.203 | 0.244 | 0.311 |
| GS                                     | 0.141 | 0.139 | 0.135 | 0.131 | 0.124 | 0.114 | 0.159 | 0.134 | 0.129 | 0.130 | 0.125 | 0.120 |
| GHS                                    | 0.126 | 0.125 | 0.125 | 0.124 | 0.121 | 0.114 | 0.148 | 0.125 | 0.123 | 0.125 | 0.122 | 0.120 |

Table S6: Average accuracy for EBV and PBV with strong genetic connectedness, using pedigree or genomic data, with varying proportion of spatial variance. The standard error for some values had order of magnitude  $10^{-2}$ , and most had  $10^{-3}$

| $\sigma_s^2/(\sigma_s^2 + \sigma_h^2)$ | EBV  |      |      |      |      |      | PBV  |      |      |      |      |      |
|----------------------------------------|------|------|------|------|------|------|------|------|------|------|------|------|
|                                        | 0    | 0.2  | 0.4  | 0.6  | 0.8  | 1    | 0    | 0.2  | 0.4  | 0.6  | 0.8  | 1    |
| <b>Pedigree</b>                        |      |      |      |      |      |      |      |      |      |      |      |      |
| G                                      | 0.49 | 0.38 | 0.32 | 0.32 | 0.31 | 0.32 | 0.30 | 0.24 | 0.20 | 0.19 | 0.18 | 0.17 |
| GH                                     | 0.57 | 0.50 | 0.44 | 0.41 | 0.38 | 0.35 | 0.36 | 0.32 | 0.27 | 0.25 | 0.22 | 0.19 |
| GS                                     | 0.51 | 0.52 | 0.53 | 0.55 | 0.57 | 0.61 | 0.31 | 0.33 | 0.34 | 0.35 | 0.36 | 0.39 |
| GHS                                    | 0.57 | 0.57 | 0.57 | 0.57 | 0.58 | 0.61 | 0.36 | 0.37 | 0.37 | 0.37 | 0.37 | 0.39 |
| <b>Genomic</b>                         |      |      |      |      |      |      |      |      |      |      |      |      |
| G                                      | 0.65 | 0.54 | 0.49 | 0.44 | 0.40 | 0.38 | 0.52 | 0.41 | 0.38 | 0.35 | 0.27 | 0.29 |
| GH                                     | 0.74 | 0.69 | 0.66 | 0.60 | 0.55 | 0.49 | 0.60 | 0.54 | 0.52 | 0.48 | 0.39 | 0.38 |
| GS                                     | 0.67 | 0.67 | 0.70 | 0.72 | 0.75 | 0.79 | 0.53 | 0.53 | 0.56 | 0.58 | 0.59 | 0.63 |
| GHS                                    | 0.74 | 0.74 | 0.75 | 0.75 | 0.76 | 0.79 | 0.60 | 0.59 | 0.61 | 0.60 | 0.60 | 0.63 |

Table S7: Average CRPS for EBV and PBV with strong genetic connectedness, using pedigree or genomic data, with varying proportion of spatial variance. The standard error for all values had order of data  $10^{-3}$

| $\sigma_s^2/(\sigma_s^2 + \sigma_h^2)$ | EBV   |       |       |       |       |       | PBV   |       |       |       |       |       |
|----------------------------------------|-------|-------|-------|-------|-------|-------|-------|-------|-------|-------|-------|-------|
|                                        | 0     | 0.2   | 0.4   | 0.6   | 0.8   | 1     | 0     | 0.2   | 0.4   | 0.6   | 0.8   | 1     |
| <b>Pedigree</b>                        |       |       |       |       |       |       |       |       |       |       |       |       |
| G                                      | 0.180 | 0.329 | 0.555 | 0.701 | 0.720 | 0.731 | 0.187 | 0.247 | 0.331 | 0.363 | 0.375 | 0.389 |
| GH                                     | 0.171 | 0.234 | 0.288 | 0.336 | 0.383 | 0.499 | 0.179 | 0.189 | 0.217 | 0.239 | 0.267 | 0.324 |
| GS                                     | 0.174 | 0.179 | 0.178 | 0.180 | 0.182 | 0.180 | 0.184 | 0.165 | 0.164 | 0.165 | 0.164 | 0.159 |
| GHS                                    | 0.170 | 0.178 | 0.175 | 0.177 | 0.181 | 0.179 | 0.179 | 0.162 | 0.160 | 0.161 | 0.162 | 0.159 |
| <b>Genomic</b>                         |       |       |       |       |       |       |       |       |       |       |       |       |
| G                                      | 0.139 | 0.188 | 0.237 | 0.289 | 0.337 | 0.394 | 0.155 | 0.173 | 0.211 | 0.243 | 0.289 | 0.313 |
| GH                                     | 0.122 | 0.134 | 0.149 | 0.176 | 0.205 | 0.264 | 0.143 | 0.132 | 0.142 | 0.160 | 0.188 | 0.221 |
| GS                                     | 0.136 | 0.135 | 0.130 | 0.126 | 0.120 | 0.111 | 0.154 | 0.130 | 0.127 | 0.125 | 0.122 | 0.115 |
| GHS                                    | 0.122 | 0.122 | 0.120 | 0.120 | 0.117 | 0.111 | 0.143 | 0.122 | 0.120 | 0.122 | 0.120 | 0.115 |

## Changing the herd clustering

Table S8 and Table S9 respectively show average accuracy and CRPS between TBV and EBV/PBV for all levels of genetic connectedness, using both pedigree and genomic data, when the herd locations were simulated from a bi-variate normal distribution with mean equal to the village locations, and variance  $1 \cdot 10^{-4} \mathbf{I}_{2 \times 2}$  (strong herd clustering). Table S10 and Table S11 respectively show average accuracy and CRPS between TBV and EBV/PBV for all levels of genetic connectedness, using both pedigree and genomic data, when the herd locations were simulated from a bi-variate normal distribution with mean equal to the village locations, and variance  $9 \cdot 10^{-4} \mathbf{I}_{2 \times 2}$  (weak herd clustering).

Table S8: Average accuracy for the different levels of genetic connectedness for EBV and PBV, using pedigree or genomic data, and the herd locations simulated using variance  $1 \cdot 10^{-4} \mathbf{I}_{2 \times 2}$  (strong herd clustering). The standard error for some values had order of magnitude  $10^{-2}$ , and most had  $10^{-3}$

|                 | Weak |      | Intermediate |      | Strong |      |
|-----------------|------|------|--------------|------|--------|------|
|                 | EBV  | PBV  | EBV          | PBV  | EBV    | PBV  |
| <b>Pedigree</b> |      |      |              |      |        |      |
| G               | 0.32 | 0.27 | 0.32         | 0.18 | 0.32   | 0.19 |
| GH              | 0.35 | 0.29 | 0.41         | 0.22 | 0.41   | 0.25 |
| GS              | 0.51 | 0.48 | 0.56         | 0.34 | 0.55   | 0.35 |
| GHS             | 0.53 | 0.50 | 0.58         | 0.36 | 0.57   | 0.37 |
| GHSC            | 0.56 | 0.54 | 0.59         | 0.37 | 0.58   | 0.38 |
| <b>Genomic</b>  |      |      |              |      |        |      |
| G               | 0.32 | 0.30 | 0.40         | 0.29 | 0.42   | 0.32 |
| GH              | 0.34 | 0.32 | 0.51         | 0.38 | 0.58   | 0.46 |
| GS              | 0.57 | 0.55 | 0.70         | 0.54 | 0.72   | 0.57 |
| GHS             | 0.61 | 0.58 | 0.73         | 0.58 | 0.75   | 0.60 |
| GHSC            | 0.63 | 0.60 | 0.74         | 0.59 | 0.75   | 0.61 |

Table S9: Average CRPS for different genetic connectedness for EBV and PBV, using pedigree or genomic data, and the herd locations simulated using variance  $1 \cdot 10^{-4} \mathbf{I}_{2 \times 2}$  (strong herd clustering). The standard error for all values had order of magnitude  $10^{-3}$

|                 | Weak  |       | Intermediate |       | Strong |       |
|-----------------|-------|-------|--------------|-------|--------|-------|
|                 | EBV   | PBV   | EBV          | PBV   | EBV    | PBV   |
| <b>Pedigree</b> |       |       |              |       |        |       |
| G               | 0.559 | 0.438 | 0.667        | 0.406 | 0.706  | 0.371 |
| GH              | 0.419 | 0.374 | 0.343        | 0.281 | 0.335  | 0.252 |
| GS              | 0.168 | 0.168 | 0.166        | 0.180 | 0.180  | 0.183 |
| GHS             | 0.165 | 0.164 | 0.166        | 0.178 | 0.179  | 0.181 |
| GHSC            | 0.160 | 0.159 | 0.163        | 0.176 | 0.176  | 0.179 |
| <b>Genomic</b>  |       |       |              |       |        |       |
| G               | 0.395 | 0.402 | 0.325        | 0.302 | 0.299  | 0.264 |
| GH              | 0.372 | 0.378 | 0.225        | 0.222 | 0.180  | 0.181 |
| GS              | 0.152 | 0.156 | 0.130        | 0.151 | 0.126  | 0.146 |
| GHS             | 0.147 | 0.151 | 0.124        | 0.146 | 0.120  | 0.142 |
| GHSC            | 0.143 | 0.147 | 0.123        | 0.145 | 0.120  | 0.142 |

Table S10: Average accuracy for the different levels of genetic connectedness for EBV and PBV, using pedigree or genomic data, and the herd locations simulated using variance  $9 \cdot 10^{-4} \mathbf{I}_{2 \times 2}$  (weak herd clustering). The standard error for some values had order of magnitude  $10^{-2}$ , and most had  $10^{-3}$

|                 | Weak |      | Intermediate |      | Strong |      |
|-----------------|------|------|--------------|------|--------|------|
|                 | EBV  | PBV  | EBV          | PBV  | EBV    | PBV  |
| <b>Pedigree</b> |      |      |              |      |        |      |
| G               | 0.33 | 0.29 | 0.32         | 0.17 | 0.32   | 0.19 |
| GH              | 0.37 | 0.31 | 0.41         | 0.22 | 0.42   | 0.25 |
| GS              | 0.55 | 0.54 | 0.56         | 0.34 | 0.55   | 0.35 |
| GHS             | 0.56 | 0.55 | 0.59         | 0.37 | 0.57   | 0.37 |
| GHSC            | 0.58 | 0.57 | 0.59         | 0.37 | 0.58   | 0.37 |
| <b>Genomic</b>  |      |      |              |      |        |      |
| G               | 0.34 | 0.31 | 0.40         | 0.27 | 0.44   | 0.33 |
| GH              | 0.36 | 0.33 | 0.53         | 0.38 | 0.61   | 0.47 |
| GS              | 0.61 | 0.60 | 0.70         | 0.54 | 0.72   | 0.57 |
| GHS             | 0.65 | 0.63 | 0.74         | 0.57 | 0.75   | 0.59 |
| GHSC            | 0.67 | 0.65 | 0.74         | 0.58 | 0.75   | 0.60 |

Table S11: Average CRPS for the different levels of genetic connectedness for EBV and PBV, using pedigree or genomic data, and the herd locations simulated using variance  $9 \cdot 10^{-4} \mathbf{I}_{2 \times 2}$  (weak herd clustering). The standard error for all values had order of magnitude  $10^{-3}$

|                 | Weak  |       | Intermediate |       | Strong |       |
|-----------------|-------|-------|--------------|-------|--------|-------|
|                 | EBV   | PBV   | EBV          | PBV   | EBV    | PBV   |
| <b>Pedigree</b> |       |       |              |       |        |       |
| G               | 0.500 | 0.410 | 0.615        | 0.392 | 0.688  | 0.370 |
| GH              | 0.393 | 0.348 | 0.326        | 0.270 | 0.325  | 0.248 |
| GS              | 0.164 | 0.163 | 0.165        | 0.179 | 0.180  | 0.184 |
| GHS             | 0.160 | 0.158 | 0.163        | 0.176 | 0.178  | 0.181 |
| GHSC            | 0.156 | 0.155 | 0.161        | 0.175 | 0.177  | 0.180 |
| <b>Genomic</b>  |       |       |              |       |        |       |
| G               | 0.374 | 0.387 | 0.308        | 0.289 | 0.282  | 0.253 |
| GH              | 0.349 | 0.362 | 0.209        | 0.211 | 0.169  | 0.174 |
| GS              | 0.145 | 0.147 | 0.130        | 0.152 | 0.126  | 0.147 |
| GHS             | 0.137 | 0.141 | 0.123        | 0.146 | 0.119  | 0.143 |
| GHSC            | 0.135 | 0.138 | 0.122        | 0.146 | 0.119  | 0.143 |

## Correlation between true spatial effect and EBV with changing herd clustering

Table S12 shows the average correlation between the EBV and the true spatial effect for all levels of genetic connectedness, using pedigree or genomic data, when the herd locations were simulated from a bi-variate normal distribution with mean equal to the village locations, and variance  $1 \cdot 10^{-4} \mathbf{I}_{2 \times 2}$  (strong herd clustering).

Table S13 shows the average correlation between the EBV and the true spatial effect for all levels of genetic connectedness, using pedigree or genomic data, when the herd locations were simulated from a bi-variate normal distribution with mean equal to the village locations, and variance  $3.5 \cdot 10^{-4} \mathbf{I}_{2 \times 2}$  (intermediate herd clustering). This is an extended table from the main paper where model GHSC is included.

Table S14 shows the average correlation between the EBV and the true spatial effect for all levels of genetic connectedness, using pedigree or genomic data, when the herd locations were simulated from a bi-variate normal distribution with mean equal to the village locations, and variance  $9 \cdot 10^{-4} \mathbf{I}_{2 \times 2}$  (weak herd clustering).

Table S12: Average correlation between EBV and true spatial effect for all levels of genetic connectedness, using pedigree or genomic data, and the herd locations simulated using variance  $1 \cdot 10^{-4} \mathbf{I}_{2 \times 2}$  (strong herd clustering). The standard error for all values had order of magnitude  $10^{-3}$

| Connectedness   | Weak | Intermediate | Strong |
|-----------------|------|--------------|--------|
| <b>Pedigree</b> |      |              |        |
| G               | 0.87 | 0.76         | 0.70   |
| GH              | 0.86 | 0.65         | 0.51   |
| GS              | 0.23 | 0.06         | 0.03   |
| GHS             | 0.27 | 0.07         | 0.03   |
| GHSC            | 0.21 | 0.06         | 0.03   |
| <b>Genomic</b>  |      |              |        |
| G               | 0.67 | 0.64         | 0.63   |
| GH              | 0.71 | 0.62         | 0.60   |
| GS              | 0.12 | 0.07         | 0.06   |
| GHS             | 0.13 | 0.06         | 0.06   |
| GHSC            | 0.10 | 0.05         | 0.05   |

Table S13: Average correlation between EBV and true spatial effect for all levels of genetic connectedness, using pedigree or genomic data, and the herd locations simulated using variance  $3.5 \cdot 10^{-4} \mathbf{I}_{2 \times 2}$  (intermediate herd clustering). The standard error for all values had order of magnitude  $10^{-3}$

| Connectedness   | Weak | Intermediate | Strong |
|-----------------|------|--------------|--------|
| <b>Pedigree</b> |      |              |        |
| G               | 0.68 | 0.64         | 0.64   |
| GH              | 0.70 | 0.60         | 0.58   |
| GS              | 0.11 | 0.06         | 0.06   |
| GHS             | 0.12 | 0.06         | 0.06   |
| GHSC            | 0.10 | 0.06         | 0.06   |
| <b>Genomic</b>  |      |              |        |
| G               | 0.84 | 0.74         | 0.69   |
| GH              | 0.83 | 0.63         | 0.50   |
| GS              | 0.16 | 0.05         | 0.04   |
| GHS             | 0.21 | 0.05         | 0.04   |
| GHSC            | 0.18 | 0.05         | 0.03   |

Table S14: Average correlation between EBV and true spatial effect for all levels of genetic connectedness, using pedigree or genomic data, and the herd locations simulated using variance  $9 \cdot 10^{-4} \mathbf{I}_{2 \times 2}$  (weak herd clustering). The standard error for all values had order of magnitude  $10^{-3}$

| Connectedness   | Weak | Intermediate | Strong |
|-----------------|------|--------------|--------|
| <b>Pedigree</b> |      |              |        |
| G               | 0.83 | 0.72         | 0.67   |
| GH              | 0.81 | 0.59         | 0.47   |
| GS              | 0.12 | 0.04         | 0.03   |
| GHS             | 0.15 | 0.04         | 0.03   |
| GHSC            | 0.14 | 0.04         | 0.02   |
| <b>Genomic</b>  |      |              |        |
| G               | 0.69 | 0.65         | 0.63   |
| GH              | 0.67 | 0.57         | 0.56   |
| GS              | 0.09 | 0.05         | 0.05   |
| GHS             | 0.09 | 0.05         | 0.05   |
| GHSC            | 0.08 | 0.04         | 0.04   |

## Real data

For the models G, GH, GS and GHS applied to the full real data, we present the DIC in Table S15.

Table S15: DIC for models G, GH, GS and GHS applied to the full real data

| Model | DIC   |
|-------|-------|
| G     | 67329 |
| GH    | 70964 |
| GS    | 70096 |
| GHS   | 70929 |
